# Supplementary figures and images for: Combined Face and Whole Eye Transplantation: Cadaveric Rehearsals and Feasibility Assessment
Source: PubMed Central journal article supplement — Plast Reconstr Surg Glob Open. 2023 Nov 16;11(11):e5409. doi: 10.1097/GOX.0000000000005409 (PMC10653600; doi:10.1097/gox.0000000000005409), 2023-11-16

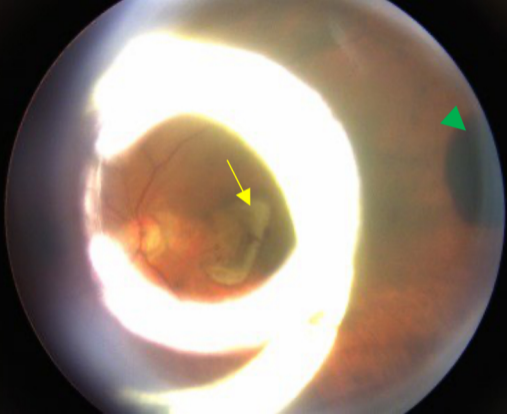

Supplement: gox-11-e5409-s003.pdf [file gox-11-e5409-s003.pdf]
